# Supplementary material for: Random X-chromosome inactivation dynamics in vivo by single-cell RNA sequencing
Source: PubMed Central journal article supplement (PMC5240438; doi:10.1186/s12864-016-3466-8), 2017-01-17

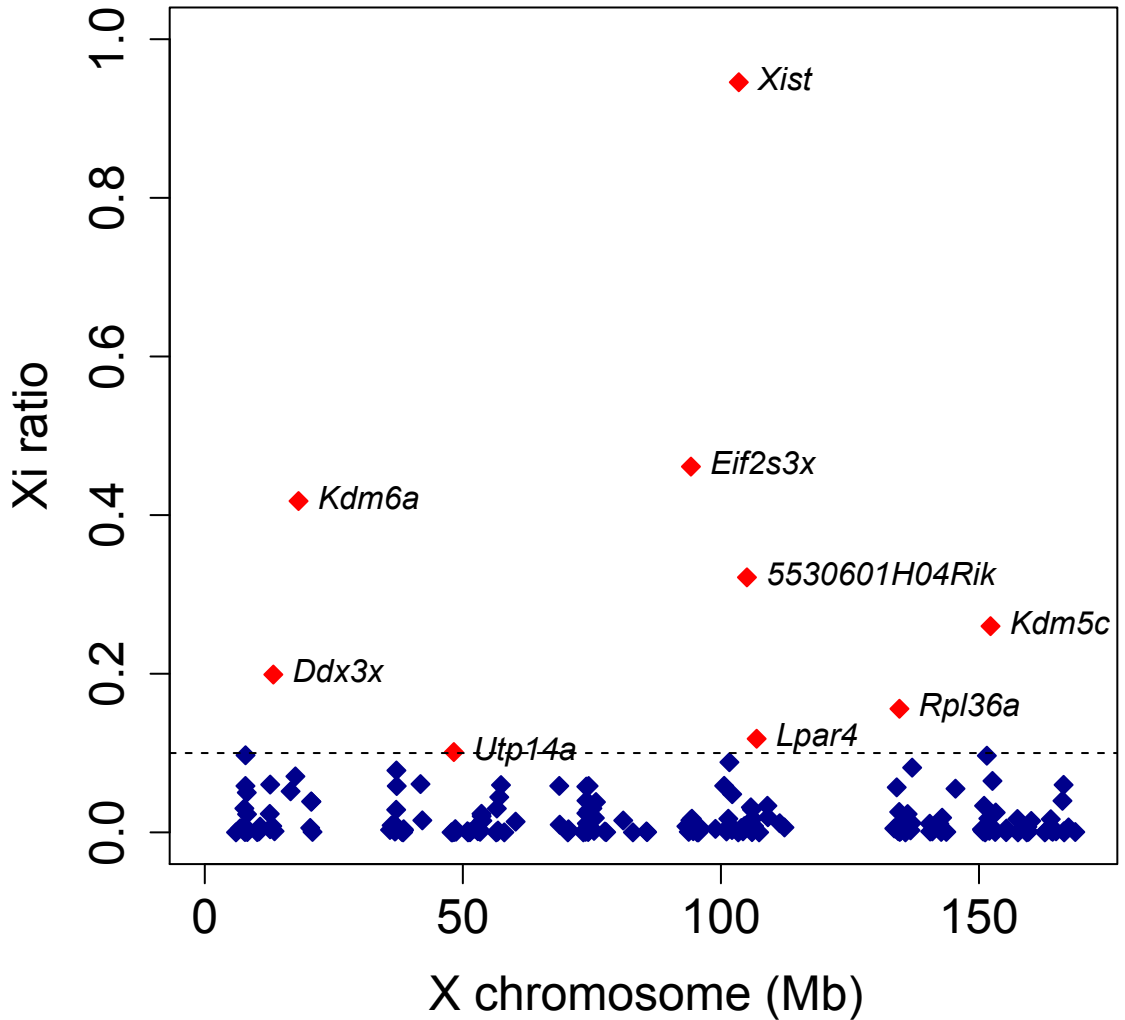

Supplement: 12864_2016_3466_MOESM8_ESM.pdf [file 12864_2016_3466_MOESM8_ESM.pdf]
