# Supplementary material for: Random X-chromosome inactivation dynamics in vivo by single-cell RNA sequencing
Source: BMC Genomics. 2017 Jan 17;18:90. doi: 10.1186/s12864-016-3466-8 (PMC5240438; doi:10.1186/s12864-016-3466-8)
Supplement: Additional file 10: Table S5. — The p-value of X:AA for each single cell by the Wilcoxon rank-sum test. (XLSX 11 kb) [file 12864_2016_3466_MOESM10_ESM.xlsx]

## Sheet: Sheet1
cell_no	XCI stage	p value	FDR adjusted p value
Cell5_5.5dpc	no-XCI	2.02845e-07	7e-06
Cell18_7.5dpc	no-XCI	2.5908e-06	1.295e-05
Cell17_7.5dpc	no-XCI	0.000109867	0.000275
Cell5_7.5dpc	no-XCI	0.000132845	0.000316667
Cell14_7.5dpc	no-XCI	0.000770719	0.00124355
Cell4_6.5dpc	no-XCI	0.00232686	0.00342647
Cell2_7.5dpc	no-XCI	0.00243078	0.00347143
Cell8_5.5dpc	no-XCI	0.0103592	0.0133333
Cell16_7.5dpc	no-XCI	0.0144198	0.018
Cell4_7.5dpc	no-XCI	0.0935086	0.103889
Cell4_5.5dpc	incomplete-XCI	1.50242e-08	2.53333e-07
Cell7_6.5dpc	incomplete-XCI	1.52202e-08	2.53333e-07
Cell3_5.5dpc	incomplete-XCI	9.62959e-07	6.01875e-06
Cell1_7.5dpc	incomplete-XCI	4.073e-05	0.000127187
Cell2_5.5dpc	incomplete-XCI	0.000163887	0.000371739
Cell10_5.5dpc	incomplete-XCI	0.000402839	0.000775
Cell6_7.5dpc	incomplete-XCI	0.00104489	0.00157576
Cell7_5.5dpc	incomplete-XCI	0.00657936	0.00913889
Cell19_7.5dpc	incomplete-XCI	0.0250198	0.0304878
Cell1_5.5dpc	incomplete-XCI	0.0261423	0.0310714
Cell9_5.5dpc	incomplete-XCI	0.107287	0.116304
Cell6_5.5dpc	incomplete-XCI	0.25777	0.26875
Cell1_6.5dpc	complete-XCI	1.25207e-08	2.53333e-07
Cell10_6.5dpc	complete-XCI	7.02329e-08	8.775e-07
Cell6_6.5dpc	complete-XCI	1.11768e-07	1.12e-06
Cell7_7.5dpc	complete-XCI	2.73985e-07	1.95714e-06
Cell19_6.5dpc	complete-XCI	2.32204e-06	1.28889e-05
Cell18_6.5dpc	complete-XCI	3.87911e-06	1.625e-05
Cell11_7.5dpc	complete-XCI	3.8992e-06	1.625e-05
Cell5_6.5dpc	complete-XCI	6.38386e-06	2.45385e-05
Cell2_6.5dpc	complete-XCI	6.91125e-06	2.46786e-05
Cell12_7.5dpc	complete-XCI	1.87399e-05	6.23333e-05
Cell16_6.5dpc	complete-XCI	7.03235e-05	0.000206765
Cell11_6.5dpc	complete-XCI	8.39052e-05	0.000227105
Cell12_6.5dpc	complete-XCI	8.63391e-05	0.000227105
Cell8_6.5dpc	complete-XCI	0.000170595	0.000371739
Cell15_7.5dpc	complete-XCI	0.000301435	0.000627083
Cell3_6.5dpc	complete-XCI	0.0003855	0.00077
Cell8_7.5dpc	complete-XCI	0.00049204	0.000911111
Cell14_6.5dpc	complete-XCI	0.000658846	0.00117069
Cell17_6.5dpc	complete-XCI	0.000678742	0.00117069
Cell9_7.5dpc	complete-XCI	0.00073502	0.001225
Cell20_6.5dpc	complete-XCI	0.000828082	0.00129375
Cell20_7.5dpc	complete-XCI	0.00803725	0.0106842
Cell9_6.5dpc	complete-XCI	0.00811673	0.0106842
Cell10_7.5dpc	complete-XCI	0.0470033	0.0546512
Cell13_7.5dpc	complete-XCI	0.0847149	0.09625
Cell15_6.5dpc	complete-XCI	0.158387	0.168085
Cell3_7.5dpc	complete-XCI	0.415017	0.423469
Cell13_6.5dpc	complete-XCI	0.827529	0.828
